# Supplementary material
Source: PubMed Central journal article supplement (PMC2688740)

## Hippocampus Volume

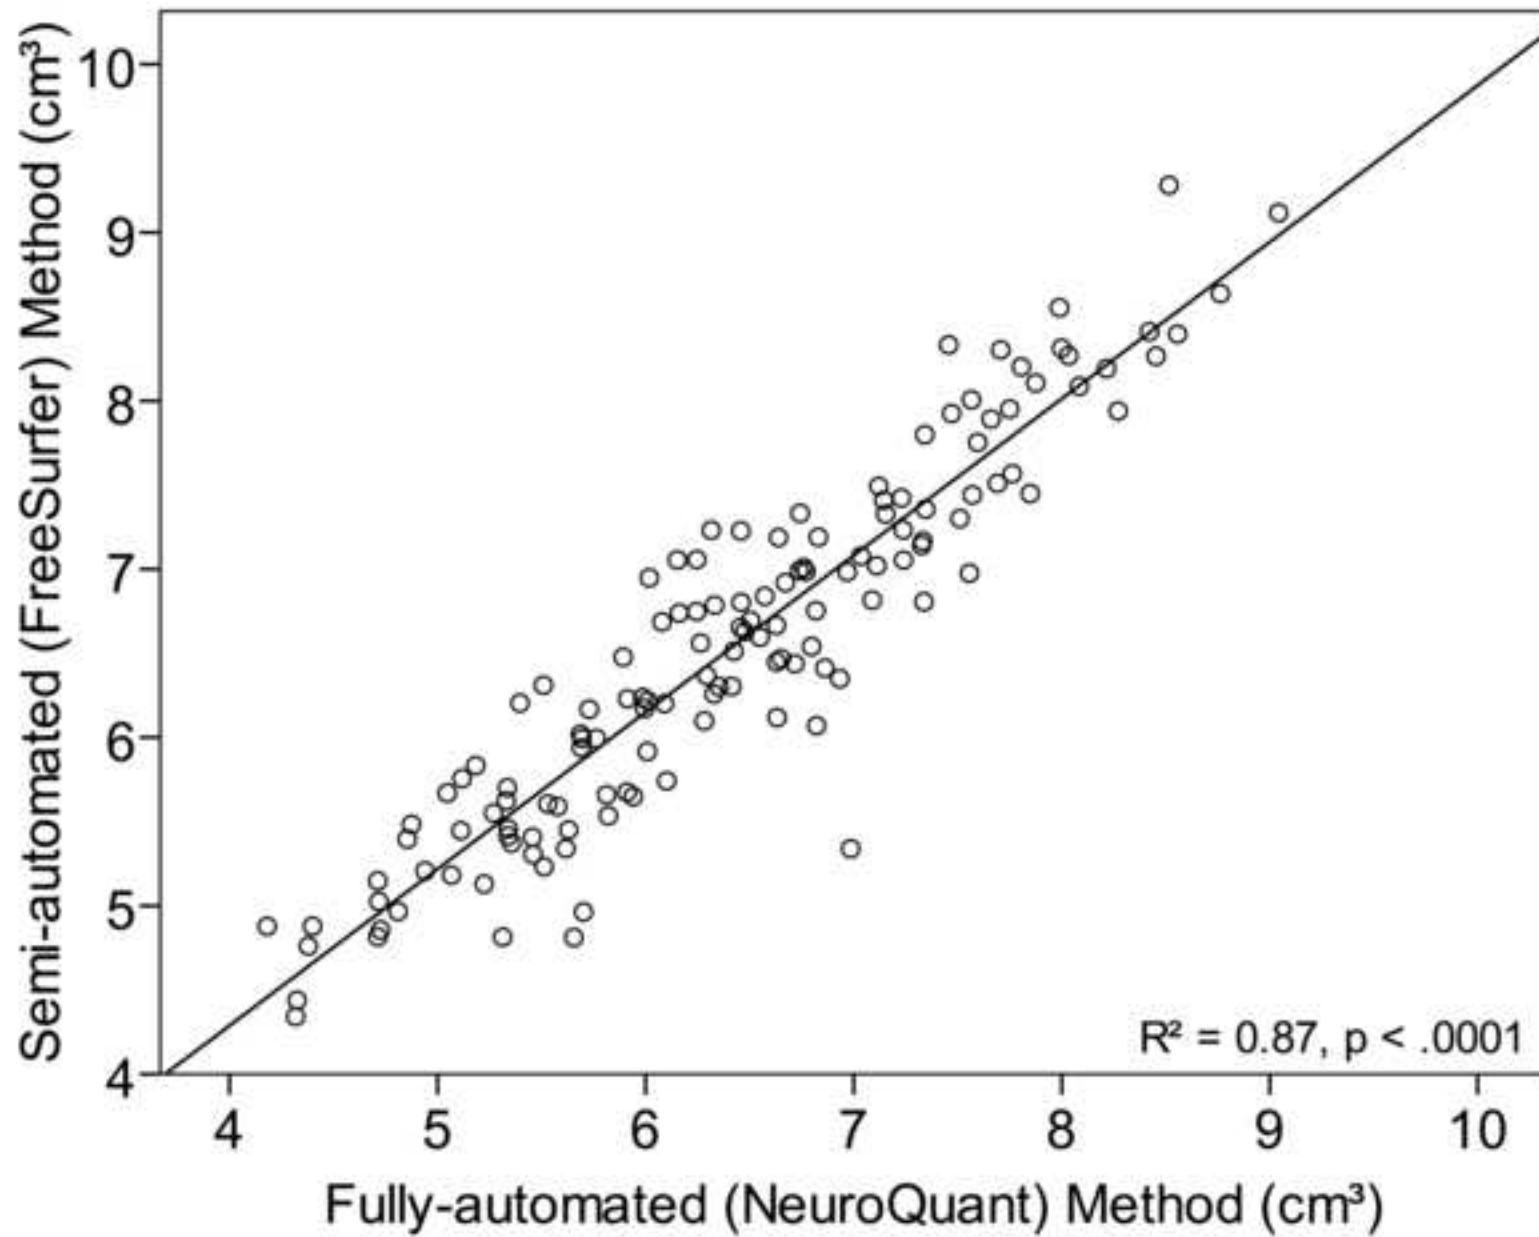

Supplement: NIHMS79108-supplement-Supplemental_F.pdf [file NIHMS79108-supplement-Supplemental_F.pdf]
